# Supplementary material
Source: PubMed Central journal article supplement (PMC5993944)
Supplement: mmc1.pdf [file mmc1.pdf]

## **Supplemental Information**

### **Long Terminal Repeat CRISPR-CAR-Coupled**

### **“Universal” T Cells Mediate Potent**

### **Anti-leukemic Effects**

**Christos Georgiadis, Roland Preece, Lauren Nickolay, Aniekan Etuk, Anastasia Petrova, Dariusz Ladon, Alexandra Danyi, Neil Humphryes-Kirilov, Ayokunmi Ajetunmobi, Daesik Kim, Jin-Soo Kim, and Waseem Qasim**

Figure S1

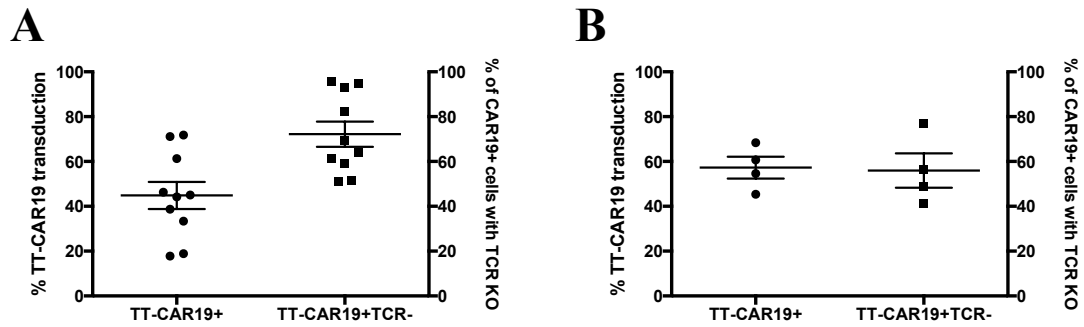

**Figure S1. Reproducibility of TT-CAR19 transduction and CRISPR/Cas9-mediated TCR knockout across donors in small and large-scale experiments. (A)** Small scale transductions of primary T cells with TT-CAR19 vector ranging between 17.8%-71.8% (Mean 44.9% SEM±6%) in n=10 laboratory experiments on different donors. CRISPR/Cas9-mediated TCR knockout averaged 72.2% SEM±5.6% in TT-CAR19+ transduced cells. **(B)** Large scale T cell manufacture and TT-CAR19 transduction of primary T cells ranged between 45.4-68.4% (Mean 57.3% SEM±4.9% in n=4 experiments on different donors. CRISPR/Cas9-mediated TCR knockout averaged 55.9% SEM±7.8% of the transduced population.

Figure S2

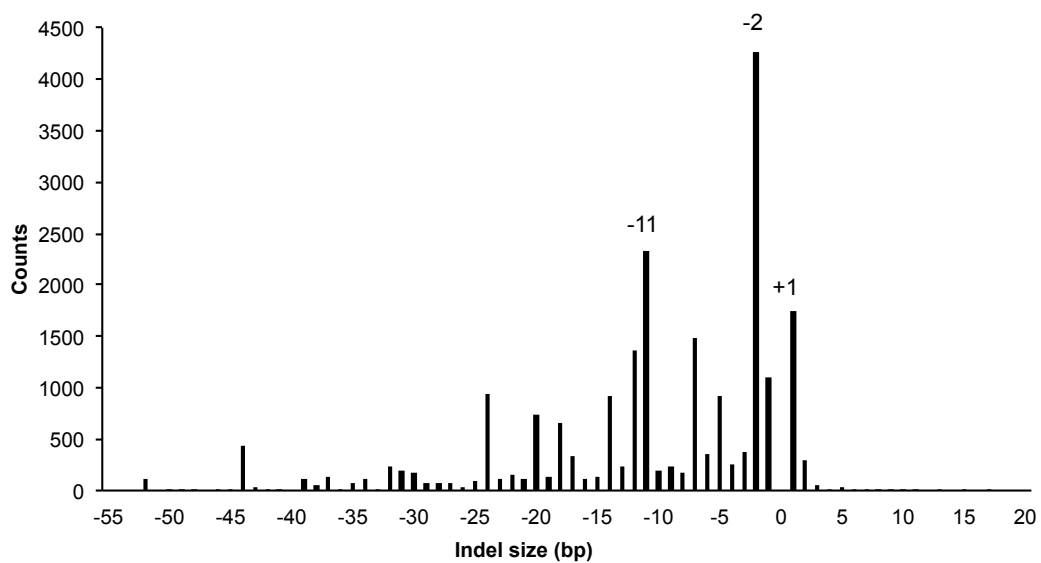

|                                                                          |     |
|--------------------------------------------------------------------------|-----|
| CAGACTTGTCACTGGATTTAGAGTCTCTCAGCTGGTACAC-GGCAGGGTCAGGGTTCTGGATATCTGTGGG  | WT  |
| CAGACTTGTCACTGGATTTAGAGTCTCTCAGCTGGTAC---GGCAGGGTCAGGGTTCTGGATATCTGTGGG  | -2  |
| CAGACTTGTCACTGGATTTAGAGTCTCTCAGCTGGT-----CAGGGTTCTGGATATCTGTGGG          | -12 |
| CAGACTTGTCACTGGATTTAGAGTCTCTCAGCTGGTACACCGGCAGGGTCAGGGTTCTGGATATCTGTGGG  | +1  |
| CAGACTTGTCACTGGATTTAGAGTCTCTCAGCTGG-----CAGGGTCAGGGTTCTGGATATCTGTGGG     | -7  |
| CAGACTTGTCACTGGATTTAGAGTCTCTCAGC-----AGGGTCAGGGTTCTGGATATCTGTGGG         | -11 |
| CAGACTTGTCACTGGATTTAGAGTCTCTCAG-----GGTCAGGGTTCTGGATATCTGTGGG            | -14 |
| CAGACTTGTCACTGGATTTAGAGTCTCTCAGCTGGTACA---GGCAGGGTCAGGGTTCTGGATATCTGTGGG | -1  |
| CAGACTTGTCACTGGATTTAGAGTCTCTCAGCTGG-----GTCAGGGTTCTGGATATCTGTGGG         | -11 |
| CAGACTTGTCACTGGATTTAGAGTCTCTCAGCTGG-----ATATCTGTGGG                      | -24 |
| CAGACTTGTCACTGGATTTAGAGTCTCTCAGCTGGTACA-----GGTCAGGGTTCTGGATATCTGTGGG    | -5  |

**Figure S2. Mutation pattern of Indels from NGS output of TT-CAR19+TCR- DNA.** Frequency of insertions and deletions from next generation sequencing output detect high number of reads of recurring -2bp and -11bp deletions and +1bp insertions with larger deletions of -44bp also seen. TRAC sgRNA sequence marked (blue) with corresponding PAM site recognized by SpCas9 (red).

**Table S1: NGS validation of *in silico* predicted off-targets in TT-CAR19+TCR- DNA.**

|       |           |                          | CAR19-TCR+ (-) sgRNA  |                         |                    | CAR19+TCR+ (+) sgRNA  |                         |                    | TT-CAR19+TCR- (+) Cas9/sgrNA |                         |                    |
|-------|-----------|--------------------------|-----------------------|-------------------------|--------------------|-----------------------|-------------------------|--------------------|------------------------------|-------------------------|--------------------|
|       |           |                          | Number of total reads | Number of mutated reads | Indel frequency(%) | Number of total reads | Number of mutated reads | Indel frequency(%) | Number of total reads        | Number of mutated reads | Indel frequency(%) |
| chr14 | 23016463  | TCTCTCAGCTGGTACACGGCAGG  | 48396                 | 0                       | 0.00               | 34931                 | 0                       | 0.00               | 37810                        | 34887                   | 92.27              |
| chr7  | 44580723  | aCgCTCgCCTGGTACACGGCTGG  | 55169                 | 0                       | 0.00               | 39687                 | 2                       | 0.01               | 42129                        | 0                       | 0.00               |
| chr8  | 142048510 | TCaCaCAGCgCGGTACACGGgGAG | 49517                 | 14                      | 0.03               | 33643                 | 14                      | 0.04               | 43973                        | 26                      | 0.06               |
| chr6  | 44205360  | gaTcaCAGCTGGTACAgGGCAAG  | 53568                 | 17                      | 0.03               | 37688                 | 11                      | 0.03               | 46834                        | 4                       | 0.01               |
| chr16 | 87840807  | gCCCTCAcCTGGgACACGGCAGG  | 51989                 | 3                       | 0.01               | 40118                 | 0                       | 0.00               | 48640                        | 0                       | 0.00               |
| chr16 | 8807456   | gCaCTCAGCTGGTACcCGGCAAG  | 49822                 | 9                       | 0.02               | 35907                 | 5                       | 0.01               | 46413                        | 13                      | 0.03               |
| chr1  | 186039861 | TCcCTCAGCTGGTACaAGGaTGG  | 53435                 | 6                       | 0.01               | 39272                 | 2                       | 0.01               | 50167                        | 3                       | 0.01               |
| chr20 | 41198892  | TLaCTCAGCaGGgACACGGCGGG  | 45631                 | 0                       | 0.00               | 33865                 | 2                       | 0.01               | 43977                        | 0                       | 0.00               |
| chr12 | 15737994  | TtTCTCcGcAgcTACACGGCAGG  | 58799                 | 2                       | 0.00               | 42195                 | 0                       | 0.00               | 58212                        | 5                       | 0.01               |
| chr1  | 237087837 | TCaaTcAGCTGGTgCACGGCTGG  | 53806                 | 0                       | 0.00               | 38605                 | 0                       | 0.00               | 51392                        | 0                       | 0.00               |
| chr22 | 35253776  | TCaCTCtCCTGGTACATGGCGGG  | 57646                 | 6                       | 0.01               | 40544                 | 2                       | 0.00               | 46592                        | 4                       | 0.01               |
| chr14 | 45553764  | TCcCggAGCTGGaACACGGCTGG  | 52479                 | 0                       | 0.00               | 39109                 | 0                       | 0.00               | 46541                        | 3                       | 0.01               |
| chr3  | 78045539  | aCTCTCAcTtGTACACGtCAAG   | 55188                 | 84                      | 0.15               | 52065                 | 73                      | 0.14               | 50526                        | 88                      | 0.17               |
| chr1  | 68621787  | cCCTCAGCAGGTACACaGCCGG   | 47208                 | 2                       | 0.00               | 36173                 | 0                       | 0.00               | 46461                        | 0                       | 0.00               |
| chr7  | 110391685 | cCTCAGCTGTaACACGGCAAG    | 64678                 | 6                       | 0.01               | 48158                 | 9                       | 0.02               | 58494                        | 17                      | 0.03               |
| chr14 | 24475017  | TCcCTCAcCTGGgACACGGgGAG  | 28510                 | 24                      | 0.08               | 21425                 | 19                      | 0.09               | 27982                        | 19                      | 0.07               |
| chr18 | 42501803  | TtTCTCAGCTGGaACaAGGCAAG  | 45923                 | 5                       | 0.01               | 33283                 | 2                       | 0.01               | 41427                        | 7                       | 0.02               |
| chr8  | 10627235  | TCTCAGCTGGaACACaGCCAGG   | 63425                 | 6                       | 0.01               | 49785                 | 6                       | 0.01               | 56721                        | 0                       | 0.00               |
| chrX  | 53285739  | TCaCaCAGCTGGgACAgGGCTGG  | 34                    | 0                       | 0.00               | 21                    | 0                       | 0.00               | 36                           | 0                       | 0.00               |
| chr22 | 38214973  | aCTTgCAGCTGGTcCACGGCGGG  | 56028                 | 7                       | 0.01               | 41984                 | 7                       | 0.02               | 51398                        | 13                      | 0.03               |
| chr3  | 4075850   | gCTCTCAGCAGGcACATGGCTAG  | 58439                 | 14                      | 0.02               | 41068                 | 4                       | 0.01               | 50454                        | 5                       | 0.01               |
| chr8  | 134463092 | TtTCTCtCCTGGTACAcTGTCTGG | 7324                  | 0                       | 0.00               | 5374                  | 0                       | 0.00               | 6976                         | 0                       | 0.00               |
| chr3  | 76258265  | TCTCTAaCTGcTACAGGGCAAG   | 62728                 | 27                      | 0.04               | 47964                 | 12                      | 0.03               | 59807                        | 16                      | 0.03               |
| chr20 | 56621614  | TCTCaCaCTtGTACAcTGCAGG   | 51789                 | 0                       | 0.00               | 36479                 | 0                       | 0.00               | 50390                        | 0                       | 0.00               |
| chr21 | 45942609  | TgTCTCtCTGGcACaAGCGGG    | 50708                 | 9                       | 0.02               | 42471                 | 2                       | 0.00               | 49297                        | 4                       | 0.01               |
| chr12 | 31673047  | TCTCAGCTGGTACATGGaTAG    | 52351                 | 8                       | 0.02               | 42940                 | 7                       | 0.02               | 42907                        | 4                       | 0.01               |
| chrX  | 140967592 | TCTCaCAGCAGGTAgAgGGCAGG  | 47025                 | 5                       | 0.01               | 37274                 | 14                      | 0.04               | 46562                        | 3                       | 0.01               |
| chr1  | 19612372  | gCTCTCAcCTGGTACACgTGGG   | 45120                 | 0                       | 0.00               | 32972                 | 0                       | 0.00               | 51500                        | 0                       | 0.00               |
| chr1  | 17336628  | TCTCaAGCTGGaACAGGGCTGG   | 39829                 | 10                      | 0.03               | 29388                 | 5                       | 0.02               | 41912                        | 3                       | 0.01               |
| chr13 | 113568533 | TgTCTCAGCTcGcACATGGCAAG  | 53702                 | 14                      | 0.03               | 40498                 | 10                      | 0.02               | 51772                        | 3                       | 0.01               |
| chr10 | 134549621 | cCTCTCAGaTGGcACACGAcCTGG | 50853                 | 0                       | 0.00               | 38290                 | 2                       | 0.01               | 49340                        | 3                       | 0.01               |
| chr22 | 23498145  | cCTCAGCTGGgACACaGCTGG    | 52416                 | 0                       | 0.00               | 38208                 | 0                       | 0.00               | 49458                        | 0                       | 0.00               |
| chr7  | 42217710  | caTCTCAGCTGGgACACaGCTGG  | 51656                 | 0                       | 0.00               | 45518                 | 0                       | 0.00               | 51372                        | 0                       | 0.00               |
| chr1  | 226350833 | TgTCTCAGCTGGTACAgGCAAG   | 52843                 | 0                       | 0.00               | 46805                 | 0                       | 0.00               | 44818                        | 0                       | 0.00               |
| chr16 | 23767191  | TCTCcAGgggGtTcACGGCGAG   | 42194                 | 0                       | 0.00               | 35209                 | 0                       | 0.00               | 41560                        | 5                       | 0.01               |
| chr19 | 45848028  | aCTCTCAGCTGtCACATGGCCAG  | 48253                 | 8                       | 0.02               | 44770                 | 9                       | 0.02               | 46022                        | 2                       | 0.00               |
| chr17 | 78117862  | TCcCTCAGCTtGTACAGGctCAG  | 44715                 | 0                       | 0.00               | 39955                 | 0                       | 0.00               | 41562                        | 2                       | 0.00               |
| chr3  | 78688933  | TCaTcAGCTGcTgCACGGCAGG   | 8506                  | 0                       | 0.00               | 43180                 | 0                       | 0.00               | 54211                        | 0                       | 0.00               |
| chr19 | 1043167   | TCcCTCAcCTGGTACgGGCTAG   | 52018                 | 0                       | 0.00               | 46120                 | 4                       | 0.01               | 50928                        | 0                       | 0.00               |
| chr7  | 19156238  | cCTCTCAGgTGGcAgACGGCAGG  | 56166                 | 0                       | 0.00               | 42876                 | 3                       | 0.01               | 54302                        | 7                       | 0.01               |
| chr10 | 6485209   | TCTTgAgATGGTACATGGTAGG   | 55550                 | 3                       | 0.01               | 43777                 | 0                       | 0.00               | 59628                        | 4                       | 0.01               |
| chr22 | 33002361  | TCTgTCAGaTGTACACaGCAAG   | 60628                 | 8                       | 0.01               | 45983                 | 7                       | 0.02               | 55728                        | 5                       | 0.01               |
| chr1  | 230006318 | TCTTgGCTGGcACAgGGCTGG    | 48884                 | 6                       | 0.01               | 37602                 | 0                       | 0.00               | 47169                        | 5                       | 0.01               |
| chr5  | 6738337   | cCTCAGCTGGgGcACGGCCAG    | 57704                 | 5                       | 0.01               | 45314                 | 0                       | 0.00               | 57556                        | 2                       | 0.00               |
| chr20 | 60294023  | TCTtTCAcTCTGGTgCAGGGCAGG | 47075                 | 18                      | 0.04               | 38567                 | 12                      | 0.03               | 45771                        | 8                       | 0.02               |

**Table S1 :** 49 *in silico* predicted off-target sites for the TRAC sgRNA were interrogated by next generation sequencing of genomic DNA from CAR19-TCR+ (-) sgRNA, CAR19+TCR+ (+) sgRNA, TT-CAR19+TCR- (+) Cas9/sgrNA samples. Number of mutated reads and Indel frequency (%) calculated for each site across samples. No significance in off-target site cleavage in TT-CAR19+TCR- observed over control samples with cutting detected solely in on-target location. 4 *in silico* predicted off-target sites (highlighted red) also detected by Digenome-seq.

**Table S2 : Digenome-seq capture of on- and off-targets using TRAC sgRNA + SpCas9 treated DNA.**

|                  | Chromosome | location  | DNA sequence at cleavage site | Digenome-seq       |           | CAR19-TCR+ (-) sgRNA  |                         |                     | CAR19+TCR+ (+) sgRNA  |                         |                     | TT-CAR19+TCR- (+) Cas9/sgRNA |                         |                     |
|------------------|------------|-----------|-------------------------------|--------------------|-----------|-----------------------|-------------------------|---------------------|-----------------------|-------------------------|---------------------|------------------------------|-------------------------|---------------------|
|                  |            |           |                               | DNA cleavage score | Bulge     | Number of total reads | Number of mutated reads | Indel frequency (%) | Number of total reads | Number of mutated reads | Indel frequency (%) | Number of total reads        | Number of mutated reads | Indel frequency (%) |
| TRAC_On-target   | chr14      | 23016470  | TCTTCAGCTGGTACACGGCAGG        | 82.9               | No        | 31144                 | 0                       | 0.00                | 31492                 | 2                       | 0.01                | 23722                        | 21913                   | 92.37               |
| TRAC_Digenome-1  | chr7       | 97862071  | TCTTCAGCTGGTACACGGCAGG        | 15.5               | No        | 24511                 | 2                       | 0.01                | 28094                 | 0                       | 0.00                | 29151                        | 2                       | 0.01                |
| TRAC_Digenome-2  | chr15      | 101405791 | TCTTCAGCTGGTACACGGCAGG        | 8.9                | No        | 43042                 | 11                      | 0.03                | 48971                 | 9                       | 0.02                | 48942                        | 9                       | 0.02                |
| TRAC_Digenome-3  | chr8       | 10827254  | TCTTCAGCTGGTACACGGCAGG        | 3.6                | No        | 63425                 | 6                       | 0.01                | 49785                 | 6                       | 0.01                | 56721                        | 0                       | 0.00                |
| TRAC_Digenome-4  | chr1       | 89821798  | cCcCTCAGc+GGTACACgCGCG        | 1.9                | No        | 47208                 | 2                       | 0.00                | 36173                 | 0                       | 0.00                | 45461                        | 0                       | 0.00                |
| TRAC_Digenome-5  | chr1       | 12543242  | ggCcaAGCTGGTACACgGCTGG        | 1.9                | No        | 46416                 | 7                       | 0.02                | 49604                 | 6                       | 0.01                | 52010                        | 3                       | 0.01                |
| TRAC_Digenome-6  | chr7       | 111507871 | cCgCTCAGCTGGTACACg+AGG        | 1.3                | No        | 46485                 | 4                       | 0.01                | 49867                 | 4                       | 0.01                | 53449                        | 7                       | 0.01                |
| TRAC_Digenome-7  | chr1       | 19612391  | gTCTCAc-CTGGTACACg+GGG        | 0.7                | No        | 45120                 | 0                       | 0.00                | 32972                 | 0                       | 0.00                | 51500                        | 0                       | 0.00                |
| TRAC_Digenome-8  | chr12      | 133393014 | ggcCTCAG+TGG-ACACGGCAGG       | 0.5                | No        | 39279                 | 7                       | 0.02                | 42692                 | 7                       | 0.02                | 45349                        | 5                       | 0.01                |
| TRAC_Digenome-9  | chr1       | 248086928 | TtTCTCAGCTGGTACAcGG+GGG       | 0.4                | No        | 40479                 | 6                       | 0.01                | 44404                 | 10                      | 0.02                | 46741                        | 9                       | 0.02                |
| TRAC_Digenome-10 | chr10      | 134549632 | cTCTCAGcTGG-ACACg+CTGG        | 0.2                | No        | 50853                 | 0                       | 0.00                | 38290                 | 2                       | 0.01                | 49340                        | 3                       | 0.01                |
| TRAC_Digenome-11 | chr16      | 8735339   | gggCaCAGCTGGTACACgCGAGG       | 0.1                | No        | 41172                 | 0                       | 0.00                | 43686                 | 0                       | 0.00                | 45707                        | 2                       | 0.00                |
| TRAC_Digenome-12 | chr11      | 92706925  | gCTCTACGcGGTACACGSc-CAG       | 0.1                | DNA bulge | 35734                 | 15                      | 0.04                | 38548                 | 17                      | 0.04                | 37600                        | 20                      | 0.05                |

**Table S2:** *In vitro* genomic DNA cleavage of CAR19-TCR+ DNA by Cas9 and off-target site capture using Digenome-seq platform. 12 sites identified with DNA cleavage score >0.1. Validation of Digenome-seq captured sites by next generation sequencing of CAR19-TCR+, CAR19+TCR+ and TT-CAR19+TCR- samples was unable to detect off-target cleavage. Verification of Digenome-seq captured on-target cleavage of the TRAC locus by NGS. 4 Digenome-seq captured sites (highlighted red) were also predicted *in silico*.

## Supplemental Methods and Materials

### Cas9 mRNA

CleanCap Cas9 mRNA (SF370, TriLink biotechnologies, San Diego, USA) expressed *Streptococcus pyogenes* Cas9 and incorporated nuclear localisation signals at both N and C terminus. mRNA was delivered by electroporation using the Neon transfection system (ThermoFisher Scientific), Lonza 4D (Lonza, London, UK) or the AgilePulse waveform electroporation system (BTX, Holliston, USA) device in accordance with manufacturers' instructions. Cells were incubated at 30°C overnight after electroporation before restoration to 37°C.

### Quantification of vector copy number

Customized primers and probe directed against vector WPRE region (FWD: AGGAGTTGTGGCCCGTTGT; REV: TGACAGGTGGTGGCAATGC) were used to quantify vector copy number (VCN) in genomic DNA extracted from transduced cells as previously described.<sup>15</sup> Reactions were performed in triplicate using 2x Absolute qPCR master mix + Rox (AB-1138, ThermoFisher Scientific) and results were normalized for albumin expression (FWD: GCTGCTATCTCTTGTGGGCTGT; REV: ACTCATGGGAGCTGCTGGTTC) and plotted against plasmid generated standard curves.

### Cytokine secretion

Effector cells (CAR19+TCR+/ CAR19+TCR-) were thawed in Roswell Park Memorial Institute (RPMI) 1640 medium (A1451701, Gibco, Massachusetts, USA) supplemented with 10% foetal calf serum (FCS). Cells were re-suspended in a 1:1 ratio with CD19+ target cells (CD19+ SupT1 cells) and control non target cells (CD19- SupT1 cells) in a 24 well format. After incubation at 37°C for 24 hours, supernatant was filtered and cryopreserved for subsequent analysis using a T<sub>H</sub>1/T<sub>H</sub>2/T<sub>H</sub>17 cytometric bead array (CBA) kit as per manufacturer's instructions (560484, BD Biosciences). All samples were run in triplicate.

### CD107a degranulation and intracellular cytokine staining assay

1x10<sup>5</sup> effector cells (CAR19+TCR+ or CAR19+TCR-) were incubated in a 96-well U-bottom plate at 1:1 ratio with Daudi cells (CD19+ target cells), in the presence of anti-human CD107a APC antibody (328620, BioLegend, London, UK). Cells were cultured for 4 hours (37°C, 5% CO<sub>2</sub>), with addition of 0.13µl GolgiStop (554724, BD Biosciences) after 1 hour. Expression of CAR19 was assessed by staining with Biotin-SP (long spacer) AffiniPure F(ab') Fragment Goat Anti-Mouse IgG, F(ab') Fragment Specific antibody (Strattech Scientific Limited) followed by Streptavidin-PE (130-106-789, Miltenyi Biotec). These cells were subsequently stained with zombie violet fixable viability dye (423113 Biolegend), anti-human HLA-DR BV510 (307646, Biolegend) and anti-human CD25 PerCP/Cy5.5 (356112, Biolegend). Cells were then fixed and permeabilised according to manufacturer protocols (554714, BD Biosciences) and stained with anti-human IFNγ AF488 (502515, Biolegend). As a positive control, CAR19+TCR- cells were incubated alone with PMA (P8139, Sigma-Aldrich, Dorset, UK) and ionomycin (I0634, Sigma-Aldrich) to a final concentration of 10ng/ml and 1µg/ml respectively. All samples were run in triplicate.

### Detection of Cas9 protein

Cell pellets (1x10<sup>6</sup> cells) were acquired at 6, 12, 24, 48, 72 and 168 hours post electroporation with Cas9 mRNA (100µg/mL). Total protein was quantified by a bicinchoninic acid (BCA) assay. Western blot was run using 25µg total protein per sample. Membrane was blotted with mouse anti-CRISPR-Cas9 antibody (ab191468, abcam, Cambridge, UK) at a 1:1000 dilution in 3% milk overnight at 4°C before incubation with secondary HRP-linked sheep anti mouse (NA931-1ML, GE Healthcare Life Sciences, Buckinghamshire, UK) at a 1:3000 dilution in 5% milk for 1 hour at room temperature. Protein was visualized by chemiluminescence using Pierce ECL western blotting substrate (32106, ThermoFisher Scientific).

### Quantitative PCR of Guide RNA Expression

sgRNA extractions were performed using the mirVANA miRNA Isolation Kit (AM1560, ThermoFisher Scientific) with subsequent DNA removal by DNA-free removal kit (AM1906, ThermoFisher Scientific). Synthesis of cDNA used 1µg of RNA and Superscript III reverse transcriptase (Invitrogen). The CFX96 Real-Time System (BIO RAD) was used for Real-time PCR, using SYBR Green Master Mix (Applied Biosystems). A common reverse primer was used for all

reactions (Scaffold REV: AAAAAAGCACCGACTCGGTGCCACT). The reverse primer (Scaffold REV: AAAAAAGCACCGACTCGGTGCCACT) and forward primer (TRAC FWD: TCTCTCAGCTGGTACACGGC) were used. Amplification of sgRNA was normalized to amplification of GAPDH from the same sample.

#### **Detection of non-homologous end joining (NHEJ) events**

Genomic DNA extraction was performed using the DNeasy Blood and Tissue Kit (69504, QIAGEN, Hilden, Germany) and a PCR based amplification of 700-800bp around sites of predicted Cas9 scission was carried out. Primers were TRAC forward: TTGATAGCTTGTGCCTGTCCC, TRAC reverse: GGCAACAGTCTGAGCAAAGG and reactions used Q5 High-Fidelity DNA Polymerase (M0491S, New England BioLabs, Hitchin, UK) on an Alpha Cyclor 4 (PCRmax, Staffordshire, UK). PCR products were discriminated by 1% agarose gel electrophoresis. PCR amplicons of genomic DNA were sequenced and analyzed using TIDE protocols (<https://tide.nki.nl/>)<sup>1</sup>.

#### **Supplemental References**

1. Brinkman EK, Chen T, Amendola M, van Steensel B. Easy quantitative assessment of genome editing by sequence trace decomposition. *Nucleic Acids Res.* 2014;42(22):e168.
